# Supplementary material for: Hydroxy and surface oxygen effects on 5-hydroxymethylfurfural oxidation to 2,5-furandicarboxylic acid on β-MnO2: DFT, microkinetic and experiment studies
Source: Royal Society of Chemistry journal article supplement (doi:10.1039/d3nr03075j), 2023-11-15
Supplement: d3nr03075j1.pdf [file d3nr03075j1.pdf]

## Supporting information

### Hydroxy and surface oxygen effects on 5-hydroxymethylfurfural oxidation to 2,5-furandicarboxylic acid on $\beta$ -MnO<sub>2</sub>: DFT, microkinetic and experiment studies

Bunrat Tharat,<sup>a</sup> Lappawat Ngamwongwan,<sup>a</sup> Theerada Seehamongkol,<sup>b</sup> Bunyarat Rungtaweivoranit,<sup>b</sup> Jeeranan Nonkumwong,<sup>b</sup> Suwit Suthirakun,<sup>a\*</sup> Kajornsak Faungnawakij,<sup>b\*</sup> Narong Chanlek,<sup>c</sup> Aunyananee Plucksacholatarn,<sup>b</sup> Weerawan Nimsaila,<sup>b</sup> Chanatkran Prommin<sup>a</sup> and Anchalee Junkaew<sup>b\*</sup>

<sup>a</sup>School of Chemistry, Institute of Science, Suranaree University of Technology, Nakhon Ratchasima, Thailand 30000.

<sup>b</sup>National Nanotechnology Center (NANOTEC), National Science and Technology Development Agency (NSTDA), 111 Thailand Science Park, Pathum Thani, Thailand 12120

<sup>c</sup>Synchrotron Light Research Institute (Public Organization), 111 University Avenue, Muang District, Nakhon Ratchasima, 30000, Thailand

\*Corresponding authors: E-mail: A. Junkaew: anchalee@nanotec.or.th, S. Suthirakun: suthirak@sut.ac.th, K. Faungnawakij: kajornsak@nanotec.or.th

### Table of Contents

|             |                                                                                                                |          |
|-------------|----------------------------------------------------------------------------------------------------------------|----------|
| <b>S1</b>   | <b>DFT calculations and microkinetic modeling</b> .....                                                        | <b>3</b> |
| <b>S1.1</b> | <b>Additional DFT computational details</b> .....                                                              | <b>3</b> |
|             | <b>Figure S1</b> Structure of the $\beta$ -MnO <sub>2</sub> (110) slab and possible active sites .....         | <b>3</b> |
| <b>S1.2</b> | <b>HMF adsorption on <math>\beta</math>-MnO<sub>2</sub>(110) surface</b> .....                                 | <b>4</b> |
|             | <b>Figure S2</b> The HMF adsorption modes on the $\beta$ -MnO <sub>2</sub> (110) surface.....                  | <b>4</b> |
|             | <b>Table S1.1</b> The calculated values of HMF adsorption .....                                                | <b>5</b> |
|             | <b>Figure S3</b> The possible adsorption configurations of HMF on $\beta$ -MnO <sub>2</sub> (110) surface .... | <b>6</b> |
| <b>S1.3</b> | <b>Hydroxylation over the <math>\beta</math>-MnO<sub>2</sub> (110) surface</b> .....                           | <b>6</b> |
|             | <b>Figure S4</b> Calculated adsorption energies and configurations of water on $\beta$ -MnO <sub>2</sub> ..... | <b>7</b> |

|                                                                                                                                                                                                          |           |
|----------------------------------------------------------------------------------------------------------------------------------------------------------------------------------------------------------|-----------|
| <b>S1.4 Oxygen vacancy formation energy on <math>\beta</math>-MnO<sub>2</sub> (110) surface .....</b>                                                                                                    | <b>8</b>  |
| <b>Figure S5</b> Free energy of oxygen vacancy formation and structure. ....                                                                                                                             | 8         |
| <b>S1.5 Energy profiles of HMF oxidation .....</b>                                                                                                                                                       | <b>9</b>  |
| <b>Figure S6</b> Energy profile of HMF oxidation on bare $\beta$ -MnO <sub>2</sub> (110) surface .....                                                                                                   | 9         |
| <b>Figure S7</b> Comparison of energy profiles of HMF oxidation on bare- and hydroxylated surfaces .....                                                                                                 | 10        |
| <b>Table S1.2.</b> The calculated activation energy ( $E_a$ ) and reaction energy ( $\Delta E$ ) at 0K for each elementary step of HMF oxidation.....                                                    | 11        |
| <b>S1.6 Microkinetic modeling .....</b>                                                                                                                                                                  | <b>12</b> |
| <b>Table S2</b> Elementary steps and the rate equations .....                                                                                                                                            | 12        |
| <b>Table S3</b> The ODE equation for each elementary step .....                                                                                                                                          | 15        |
| <b>Figure S8</b> The natural logarithm of reaction rate as a function of 1/T and the calculated apparent activation energy .....                                                                         | 17        |
| <b>Figure S9</b> The primary Campbell's degree of rate control ( $X_{RC,i}$ ), the degrees of thermodynamic rate control ( $X_{TRC,i}$ ), and the primary intermediate coverage versus temperature ..... | 18        |
| <b>S1.7 Electronic charge analysis .....</b>                                                                                                                                                             | <b>19</b> |
| <b>Figure S10</b> Bader charge analyses of selected steps .....                                                                                                                                          | 19        |
| <b>S2 Experiment .....</b>                                                                                                                                                                               | <b>20</b> |
| <b>S2.1 Continuous flow oxidation of HMF over the synthesized <math>\beta</math>-MnO<sub>2</sub> catalyst .....</b>                                                                                      | <b>20</b> |
| <b>Figure S11</b> Continuous flow oxidation of HMF over the synthesized $\beta$ -MnO <sub>2</sub> catalyst                                                                                               | 20        |
| <b>S2.2 Oxidation of HMF using a batch reactor over the synthesized <math>\beta</math>-MnO<sub>2</sub> catalyst</b>                                                                                      | <b>20</b> |
| <b>Figure S12</b> Time course for the oxidation of HMF into FDCA in a batch reactor .....                                                                                                                | 21        |
| <b>Figure S13</b> Effects of NaHCO <sub>3</sub> on the oxidation of HMF into FDCA catalyzed by $\beta$ -MnO <sub>2</sub> in a batch reactor.....                                                         | 22        |
| <b>S2.3 Characterization of the <math>\beta</math>-MnO<sub>2</sub> catalyst.....</b>                                                                                                                     | <b>22</b> |
| <b>Figure S14</b> CO <sub>2</sub> TPD of fresh $\beta$ -MnO <sub>2</sub> catalyst.....                                                                                                                   | 23        |
| <b>Figure S15</b> In situ DRIFTS of as synthesized $\beta$ -MnO <sub>2</sub> catalyst and after treatment with H <sub>2</sub> O. ....                                                                    | 23        |
| <b>S2.4 Characterization of FDCA.....</b>                                                                                                                                                                | <b>24</b> |
| <b>Figure S16</b> FDCA obtained from the acidification of reaction solution.....                                                                                                                         | 24        |
| <b>Figure S17</b> <sup>1</sup> H NMR of FDCA.....                                                                                                                                                        | 24        |
| <b>Figure S18</b> <sup>13</sup> C NMR of FDCA.....                                                                                                                                                       | 25        |

## S1. DFT calculations and microkinetic modeling

### S1.1 Additional DFT computational details

The Mn  $3d^6 4s^1$ , O  $2s^2 2p^4$ , C  $2s^2 2p^2$ , and H  $1s^1$  were treated as valence electrons. All gas-phase simulations were calculated in a cubic box of  $15 \times 15 \times 15 \text{ \AA}^3$ . A bulk structure of the rutile-type  $\beta\text{-MnO}_2$  was optimized by the k-point grid of  $7 \times 7 \times 11$ . A  $4 \times 2 \beta\text{-MnO}_2(110)$  slab with dimensions of  $11.48 \text{ \AA} \times 12.43 \text{ \AA} \times 23.09 \text{ \AA}$  was cleaved from the optimized bulk structure. Three  $\beta\text{-MnO}_2$  layers consisting of 48 Mn atoms and 96 O atoms were separated by  $15 \text{ \AA}$  of vacuum region along the z-axis to avoid interactions between periodic images (Figure S1a, S1b). The bottom layer was fixed to their bulk lattice positions, whereas the two top layers and adsorbed species were allowed to fully relax during the calculations. The possible active sites of the  $\beta\text{-MnO}_2(110)$  slab are atop site of four-fold-coordinate Mn (top-Mn<sub>4c</sub>), atop site of five-fold-coordinate (top-Mn<sub>5c</sub>), bridge site between two four-fold-coordinate Mn atoms (bridge-Mn<sub>4c</sub>), and atop site of three-fold-coordinate O (top-O<sub>3c</sub>) as presented in Figure S1c.

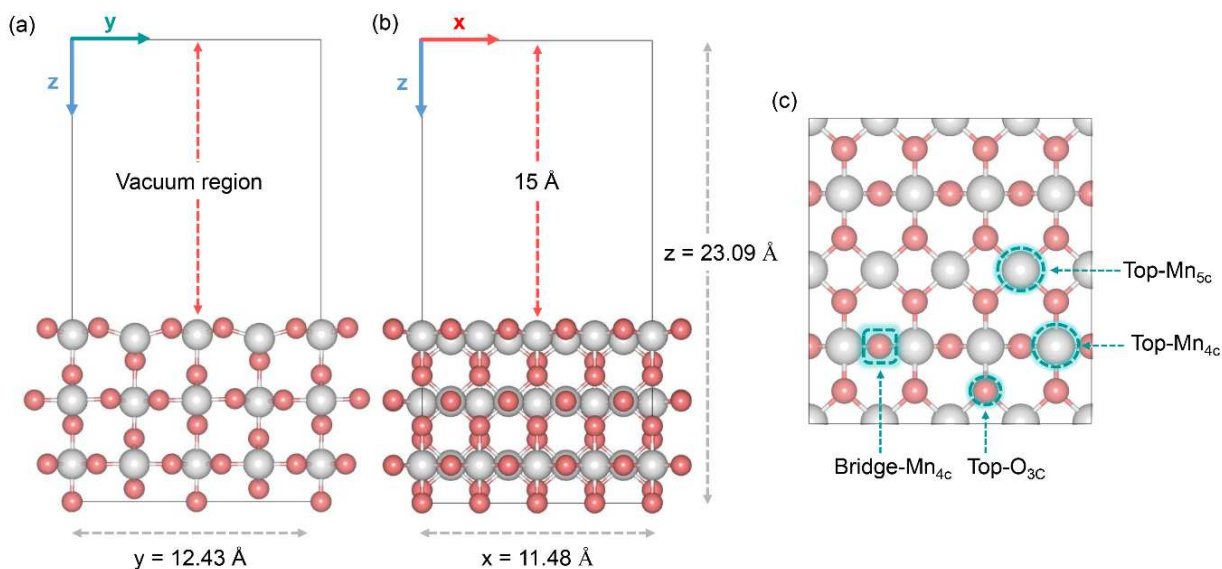

**Figure S1.** Structure of the  $\beta\text{-MnO}_2(110)$  slab projected along (a) the (010) direction (b) (100) the direction, and (c) possible active sites on the  $\beta\text{-MnO}_2(110)$  surface.

The zero-point energy and the vibrational partition functions are calculated as,

$$E_{ZPE} = \sum_i \frac{h\nu_i}{2}$$

$$q_{vib} = \prod_i \frac{1}{1 - e^{-h\nu_i/k_B T}}$$

where  $\nu_i$  is the vibrational frequency of each vibrational mode of the adsorbed species that are calculated from the DFT.

### S1.2 HMF adsorption on $\beta$ -MnO<sub>2</sub>(110) surface

The possible adsorption modes of HMF on the  $\beta$ -MnO<sub>2</sub>(110) surface were carried out in this part. The HMF molecule possibly attaches the oxygen of hydroxyl group and/or the oxygen of formyl group with the surface forming a bridge-like configuration or end-on configurations as illustrated in Figure S2.

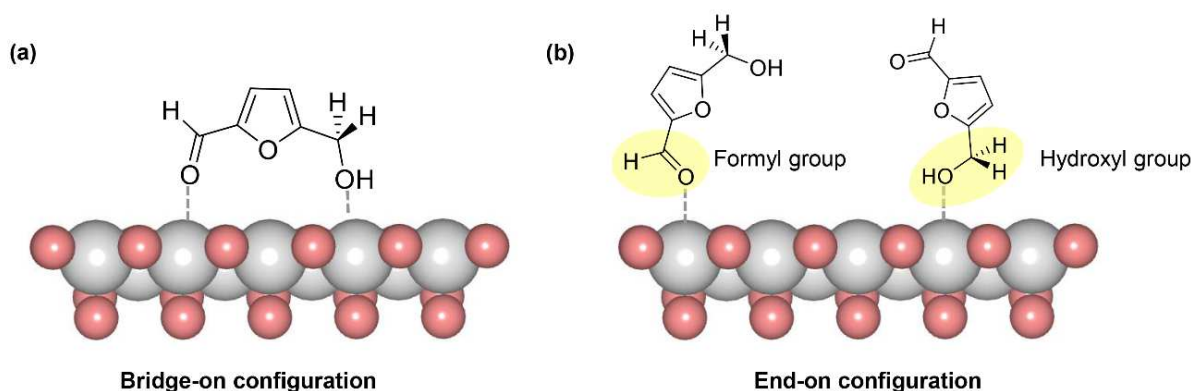

**Figure S2.** The HMF adsorption modes on the  $\beta$ -MnO<sub>2</sub>(110) surface (a) bridge-on configuration, and (b) end-on configurations.

The adsorption energy ( $E_{ads}$ ) of HMF molecule on  $\beta$ -MnO<sub>2</sub>(110) surface was calculated as follows:

$$E_{ads} = E_{HMF/MnO_2} - E_{MnO_2} - E_{HMF}$$

where  $E_{HMF/MnO_2}$  is the total energy of the adsorbate molecule-substrate complex,  $E_{MnO_2}$  is the total energy of a bare  $\beta$ -MnO<sub>2</sub>(110) surface, and  $E_{HMF}$  is the total energy of an isolated HMF molecule in a vacuum. A negative  $E_{ads}$  indicates energetically favorable adsorption.

The calculated adsorption energy ( $E_{ads}$ ) and bond lengths between selected atoms of HMF molecule and  $\beta$ -MnO<sub>2</sub>(110) surface are summarized in Table S1. Figure S3 shows the relevant

adsorption configurations. Due to the unsaturated coordination of Mn<sub>4c</sub> sites enable them to act as active sites assisting the nucleophilic attack from both functional groups of HMF in the oxidation process. The formyl and hydroxyl groups of HMF molecule interact with the bridge-Mn<sub>4c</sub> site.

**Table S1.1.** The calculated E<sub>ads</sub> (in eV), and bond distances (in Å) of selected atoms of the selected configurations of HMF adsorption on β-MnO<sub>2</sub>(110)

| Adsorption modes   | Configurations | Favored sites                                 | ΔE <sub>ads</sub><br>(eV) | O <sub>(OH)-</sub><br>Mn <sub>4C</sub><br>(Å) | O <sub>(c=O)-</sub><br>Mn <sub>4C</sub><br>(Å) | H <sub>(OH)-</sub><br>O<br>(Å) |
|--------------------|----------------|-----------------------------------------------|---------------------------|-----------------------------------------------|------------------------------------------------|--------------------------------|
| Formyl-End-on      | 1A             | top-Mn <sub>4C</sub>                          | -0.13                     | -                                             | 2.02                                           | -                              |
| Hydroxyl-End-on    | 1B             | bridge-Mn <sub>4C</sub>                       | -0.82                     | 2.20, 2.33                                    | -                                              | 2.36,<br>2.47                  |
| Vertical-Bridge-on | 1C             | bridge-Mn <sub>4C</sub>                       | -0.34                     | 2.26, 2.34                                    | 2.13, 2.91                                     | 2.22,<br>2.29                  |
|                    | 1D             | bridge-Mn <sub>4C</sub>                       | -1.44                     | 2.24, 3.26                                    | 2.19, 2.33                                     | 2.24                           |
| Parallel-Bridge-on | 2D             | bridge-Mn <sub>4C</sub>                       | -1.25                     | 2.29, 2.31                                    | 2.26, 2.83                                     | 1.94                           |
|                    | 3D             | top-Mn <sub>4C</sub> /bridge-Mn <sub>4C</sub> | -1.14                     | 2.30                                          | 2.32, 2.59                                     | 2.46                           |

The HMF molecule points oxygen atoms of hydroxyl toward the Mn<sub>4c</sub> site and formyl groups toward the on-bridge site called a 1D parallel configuration (see Figure S3). The most stable is the 1D configuration with an adsorption energy of -1.44 eV. This indicates chemisorption and quite strong binding of HMF on β-MnO<sub>2</sub>(110). Similarly, 2D and 3D parallel configurations show the E<sub>ads</sub> of -1.25 eV and -1.14 eV, respectively. The bridge-on configurations are preferable than the end-on configurations, which agrees well with the result of HMF adsorption on β-MnO<sub>2</sub>(110) reported previously.<sup>1</sup> The calculated E<sub>ads</sub> in this work is similar to the HMF adsorption on Pd/α-MnO<sub>2</sub>(110) (-3.34 eV)<sup>2</sup>, Pd<sub>13</sub>/α-MnO<sub>2</sub>(110) (-2.79 eV)<sup>2</sup>, which are more energetically stable than that of Co<sub>3</sub>O<sub>4</sub>(110) (-1.56 eV)<sup>1</sup>, and CuO(111) (-0.79 eV).<sup>1</sup>

It is to be noted that the 2D configuration was used as the initial structure to study the reaction mechanism of the HMF oxidation to FDCA. Its E<sub>ads</sub> value is slightly higher than that of the 1D configuration and its structure is more suitable for the oxidation reaction. The hydrogen bond

between H of hydroxyl group and the oxygen active site on the surface with the distance of 1.94 Å leading to the O–H bond elongation from 0.97 Å to 0.99 Å.

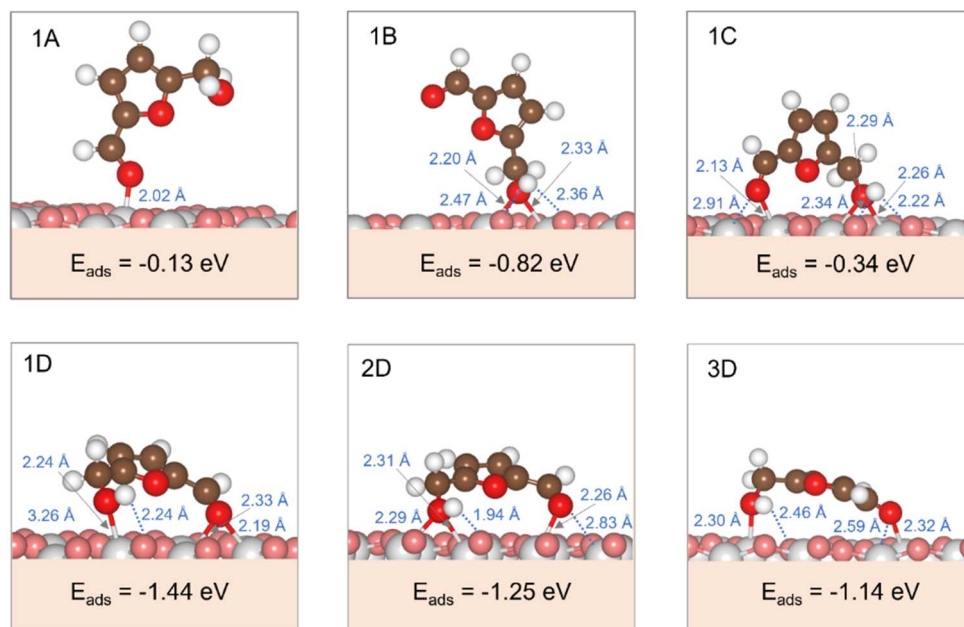

**Figure S3.** The possible adsorption configurations of HMF on the  $\beta$ - $\text{MnO}_2(110)$  surface.

### S1.3 Hydroxylation over the $\beta$ - $\text{MnO}_2(110)$ surface

To understand hydroxylation over the  $\beta$ - $\text{MnO}_2(110)$  surface,  $\text{H}_2\text{O}$  adsorption and dissociation in different coverage ( $\theta$ ) are investigated in this part. As shown in Figure S4a and b, the  $E_{\text{ads}}$  increases (or less stability) when the coverage increases. The result also suggests that the OH coverage of 0.13 is the most thermodynamically stable configuration due to its lowest free energy compared to others, as shown in Figure S4b and S4c. Figure S4c and S4d reveal the free energy increases when the temperature increases. The partial hydroxylation over the  $\beta$ - $\text{MnO}_2(110)$  surface occurs at the temperature, 393 K, used in our experiment.

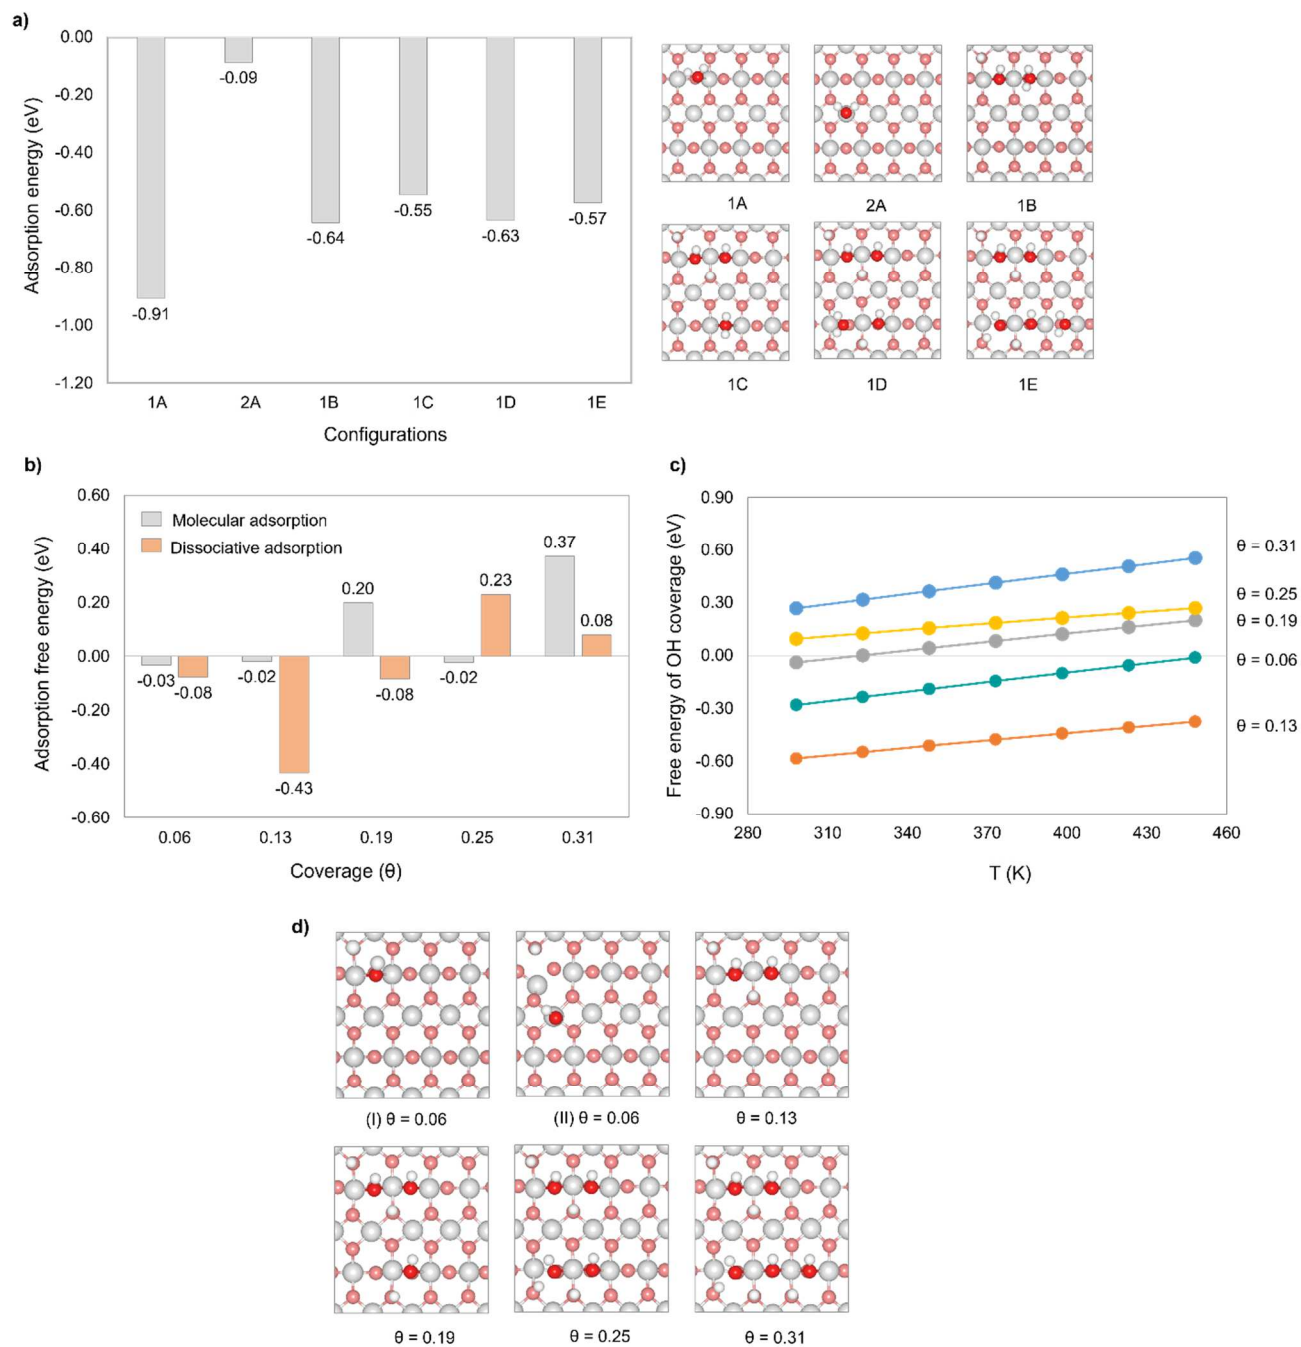

**Figure S4.** (a) Adsorption energy ( $E_{\text{ads}}$ ) of  $\text{H}_2\text{O}$  on the bare-surfaces (1A and 2A) and hydroxylated surfaces (1B, 1C, 1D, and 1E). (b) Adsorption free energy ( $G_{\text{ads}}$ ) of molecular and dissociated  $\text{H}_2\text{O}$  over  $\beta\text{-MnO}_2$  at 393 K. (c) Free energy of OH coverage on  $\beta\text{-MnO}_2$  versus temperature (T) and (d) the most stable structure of each OH coverage model.

### S1.4 Oxygen vacancy formation energy on $\beta$ -MnO<sub>2</sub> (110) surface

Active surface oxygen is essential in the HMF oxidation if the catalyst surface has low hydroxyl group coverage. We found that the C-H bond breaking of acetal and hemiacetal-like structures has an oxygen vacancy ( $V_{O^*}$ ) formation simultaneously occurring on the surface (R3, R10, R14, and R21). The low oxygen vacancy formation energy results in a strong oxidizing ability and facilitates the detachment of oxygen atoms from the surface of the catalyst. Therefore, we have calculated the oxygen vacancy formation energy on the bare and hydroxylated surface. The energy of oxygen vacancy formation,  $E_{VO}$ , can be calculated from the following equation.

$$E_{VO} = E_{O-vacancy} + \frac{1}{2}E_{O_2} - E_{perfect}$$

where  $E_{O-vacancy}$  and  $E_{perfect}$  are the calculated total energies of the surface with one oxygen vacancy and the perfect surface, respectively.  $E_{O_2}$  is the total energy of an isolated O<sub>2</sub> molecule.

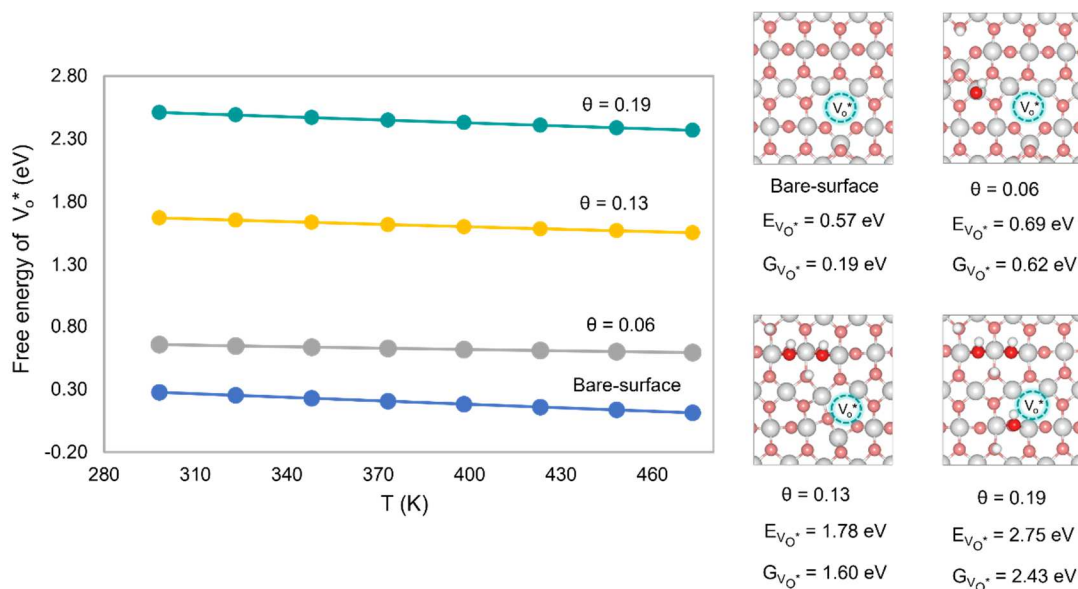

**Figure S5.** Free energy of oxygen vacancy formation ( $G_{VO^*}$ ) versus temperature (T) and the most stable structure of each vacancy formation model on bare- and hydroxylated  $\beta$ -MnO<sub>2</sub> (110) surfaces ( $G_{VO^*}$  at 393 K).

The result reveals that the oxygen vacancy formation energy on a bare surface ( $G_{VO^*} = 0.19$  eV) is lower than on a hydroxylated surface. Increasing OH coverage on the surface (0.06 to 0.19) leads to the increase of  $V_{O^*}$  energy. Moreover, the free energy of  $V_{O^*}$  slightly decreases at elevated temperatures, as shown in Figure S5. This result indicates oxygen vacancy formation on the bare surface is easier than that on a hydroxylated surface. As shown in Table 1, the C-H bond breaking



of hemiacetal-like structure at TSC4 ( $\Delta G^\ddagger=1.01$  eV) via R21 has an energy barrier higher than the TSC2 ( $\Delta G^\ddagger=0.67$  eV) via R14. TSC4 of pathway CI-OH associates surface oxygen formation near the OH site resulting in the higher  $\Delta G^\ddagger$  value than TSC2 of pathway C, that the surface oxygen formation is easier.

### S1.5 Energy profiles of HMF oxidation

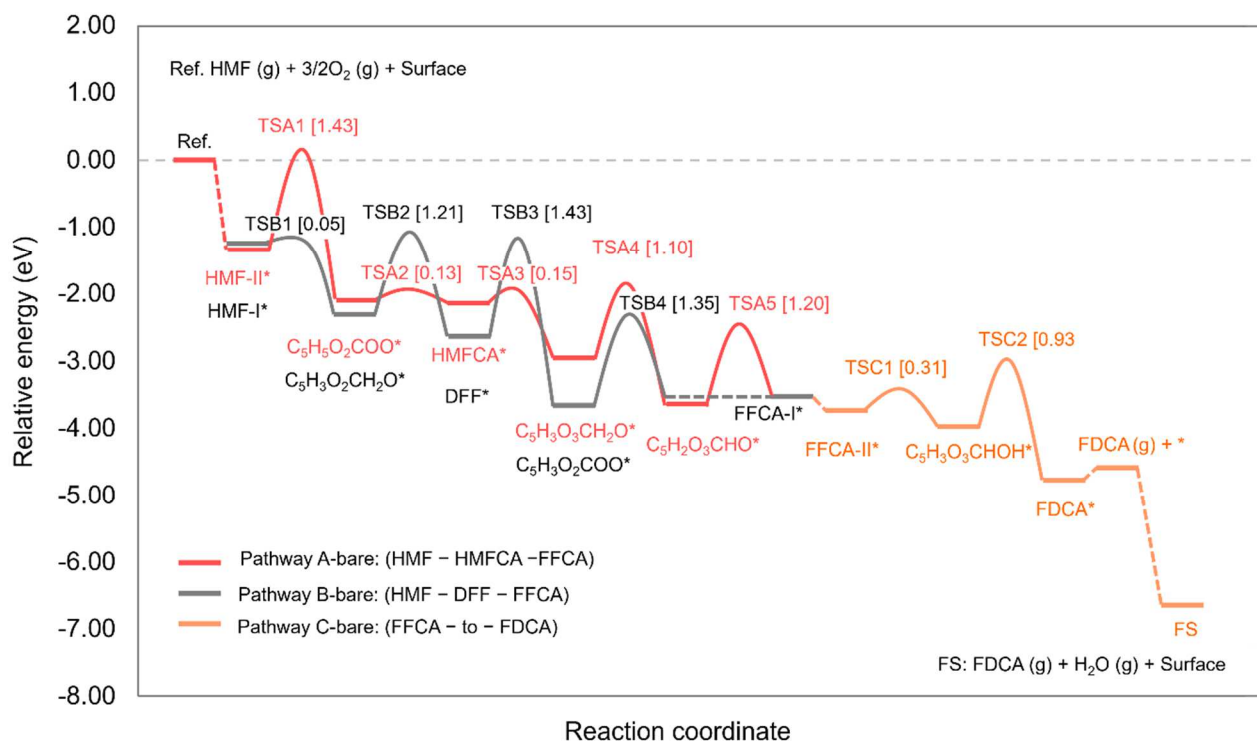

**Figure S6.** Energy profile of HMF oxidation on bare  $\beta\text{-MnO}_2(110)$  surface.

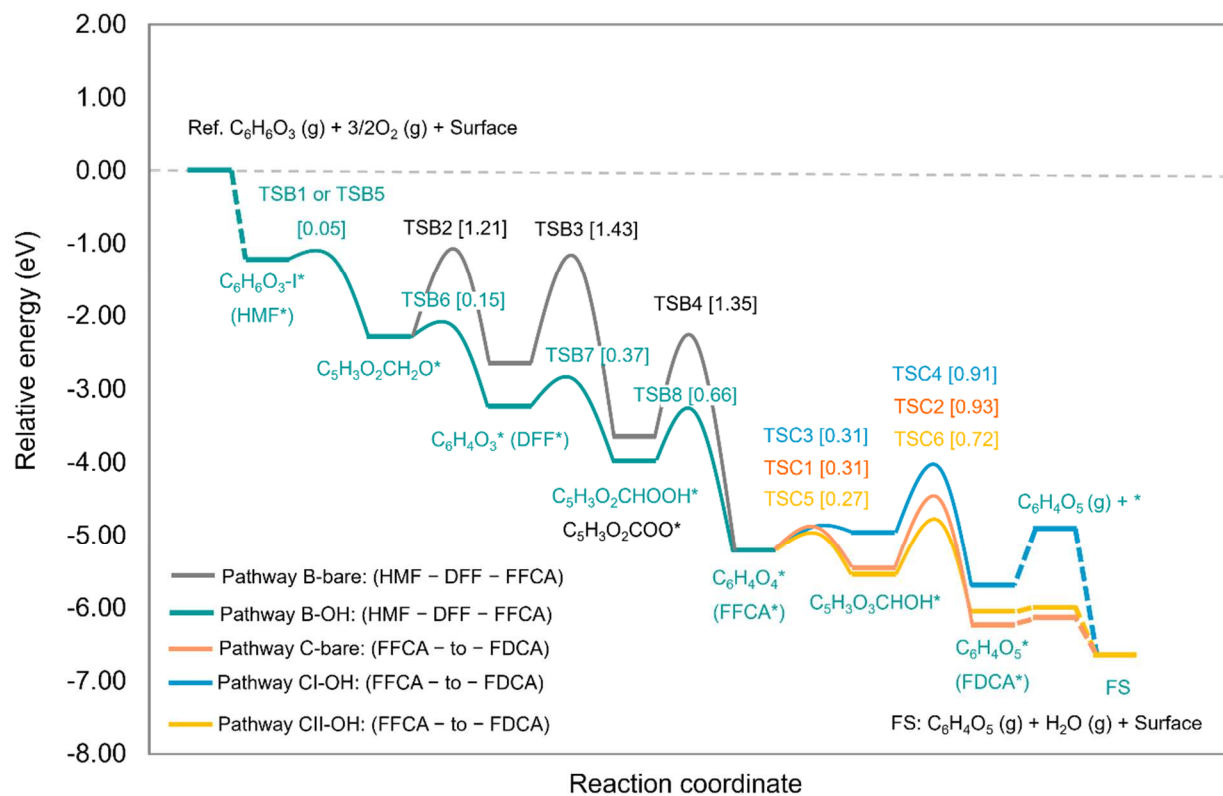

**Figure S7.** Comparison of energy profiles of HMF oxidation on bare- and hydroxylated surfaces.

**Table S1.2.** The calculated energy barrier ( $E_a$ ) and reaction energy ( $\Delta E$ ) at 0K for each elementary step of HMF oxidation on bare and hydroxylated  $\beta$ -MnO<sub>2</sub>(110) surfaces.

| Reaction step         | Elementary step                                                                | $E_a$ (eV) | $\Delta E$ (eV) |
|-----------------------|--------------------------------------------------------------------------------|------------|-----------------|
| R1                    | $C_6H_6O_3(g) + * \rightleftharpoons C_6H_6O_3-I^*$                            |            | -1.25           |
| <b>Pathway A-bare</b> |                                                                                |            |                 |
| R2                    | $C_6H_6O_3-I^* \rightleftharpoons C_6H_6O_3-II^*$                              |            | -0.06           |
| R3                    | $C_6H_6O_3-II^* + O^* \rightleftharpoons C_5H_5O_2COO^* + H^* + V_O^*$         | 1.43       | -0.79           |
| R4                    | $C_5H_5O_2COO^* + H^* \rightleftharpoons C_6H_6O_4^*$                          | 0.13       | -0.05           |
| R5                    | $C_6H_6O_4^* \rightleftharpoons C_5H_3O_3CH_2O^* + H^*$                        | 0.15       | -0.81           |
| R6                    | $C_5H_3O_3CH_2O^* \rightleftharpoons C_5H_2O_3CHO^* + 2H^*$                    | 1.10       | -0.69           |
| R7                    | $C_5H_2O_3CHO^* + H^* \rightleftharpoons C_6H_4O_4 -I^*$                       | 1.20       | 0.15            |
| <b>Pathway B-bare</b> |                                                                                |            |                 |
| R8                    | $C_6H_6O_3-I^* \rightleftharpoons C_5H_3O_2CH_2O^* + H^*$                      | 0.05       | -1.06           |
| R9                    | $C_5H_3O_2CH_2O^* \rightleftharpoons C_6H_4O_3^* + H^*$                        | 1.21       | -0.33           |
| R10                   | $C_6H_4O_3^* + O^* \rightleftharpoons C_5H_3O_2COO^* + H^* + V_O^*$            | 1.43       | -1.03           |
| R11                   | $C_5H_3O_2COO^* + H^* \rightleftharpoons C_6H_4O_4 -I^*$                       | 1.35       | 0.16            |
| <b>Pathway C-bare</b> |                                                                                |            |                 |
| R12                   | $C_6H_4O_4 -I^* \rightleftharpoons C_6H_4O_4 -II^*$                            |            | -0.24           |
| R13                   | $C_6H_4O_4 -II^* + H^* \rightleftharpoons C_5H_3O_3CHOH^*$                     | 0.31       | -0.22           |
| R14                   | $C_5H_3O_3CHOH^* + O^* \rightleftharpoons C_6H_4O_5^* + V_O^*$                 | 0.93       | -0.79           |
| R15                   | $C_6H_4O_5^* \rightleftharpoons C_6H_4O_5(g) + *$                              |            | 0.12            |
| <b>Pathway B-OH</b>   |                                                                                |            |                 |
| R16 (or R8)           | $C_6H_6O_3-I^* \rightleftharpoons C_5H_3O_2CH_2O^* + H^*$                      | 0.05       | -1.06           |
| R17                   | $C_5H_3O_2CH_2O^* + ^*OH \rightleftharpoons C_6H_4O_3^* + H_2O^*$              | 0.15       | -0.94           |
| R18                   | $C_6H_4O_3^* + ^*OH \rightleftharpoons C_5H_3O_2CHOOH^*$                       | 0.37       | -0.74           |
| R19                   | $C_5H_3O_2CHOOH^* + ^*OH \rightleftharpoons C_6H_4O_4^* + H_2O^*$              | 0.66       | -1.24           |
| <b>Pathway CI-OH</b>  |                                                                                |            |                 |
| R20 (or R13)          | $C_6H_4O_4^* + H^* \rightleftharpoons C_5H_3O_3CHOH^*$                         | 0.31       | 0.27            |
| R21                   | $C_5H_3O_3CHOH^* + ^*OH + O^* \rightleftharpoons C_6H_4O_5^* + H_2O^* + V_O^*$ | 0.91       | -0.76           |
| R22                   | $C_6H_4O_5^* + H_2O^* \rightleftharpoons C_6H_4O_5(g) + ^* + H_2O^*$           |            | 0.78            |
| <b>Pathway CII-OH</b> |                                                                                |            |                 |
| R23                   | $C_6H_4O_4^* + ^*OH \rightleftharpoons C_5H_3O_3CHOOH^*$                       | 0.27       | -0.29           |
| R24                   | $C_5H_3O_3CHOOH^* + ^*OH \rightleftharpoons C_6H_4O_5^* + H_2O^*$              | 0.72       | -0.53           |
| R25                   | $C_6H_4O_5^* + H_2O^* \rightleftharpoons C_6H_4O_5(g) + ^* + H_2O^*$           |            | 0.02            |

## S1.6 Microkinetic modeling

**Table S2.** The elementary steps and the rate equations of HMF oxidation on the  $\beta$ -MnO<sub>2</sub>(110) surface used in the microkinetic modelling, which is equivalent to the elementary steps in Table 1.

| Reaction step         | Elementary step                                                       | Rate equations                                                                            |
|-----------------------|-----------------------------------------------------------------------|-------------------------------------------------------------------------------------------|
| R1                    | $C_6H_6O_3(g) + * \rightleftharpoons C_6H_6O_3-I^*$                   | $r_1 = k_1 P_{C_6H_6O_3} \theta_* - k_{-1} \theta_{C_6H_6O_3-I}$                          |
| <b>Pathway A-bare</b> |                                                                       |                                                                                           |
| R2                    | $C_6H_6O_3-I^* \rightleftharpoons C_6H_6O_3-II^*$                     | $r_2 = k_2 \theta_{C_6H_6O_3-I} - k_{-2} \theta_{C_6H_6O_3-II}$                           |
| R3                    | $C_6H_6O_3-II^* \rightleftharpoons C_5H_5O_2COO\_H\_V_O^*$            | $r_3 = k_3 \theta_{C_6H_6O_3-II} - k_{-3} \theta_{C_5H_5O_2COO\_H\_V_O}$                  |
| R4                    | $C_5H_5O_2COO\_V_O\_H^* \rightleftharpoons C_6H_6O_4\_V_O^*$          | $r_4 = k_4 \theta_{C_5H_5O_2COO\_H\_V_O} - k_{-4} \theta_{C_6H_6O_4\_V_O}$                |
| R5                    | $C_6H_6O_4\_V_O^* \rightleftharpoons C_5H_3O_3CH_2O\_H\_V_O^*$        | $r_5 = k_5 \theta_{C_6H_6O_4\_V_O} - k_{-5} \theta_{C_5H_3O_3CH_2O\_H\_V_O}$              |
| R6                    | $C_5H_3O_3CH_2O\_H\_V_O^* \rightleftharpoons C_5H_2O_3CHO\_3H\_V_O^*$ | $r_6 = k_6 \theta_{C_5H_3O_3CH_2O\_H\_V_O} - k_{-6} \theta_{C_5H_2O_3CHO\_3H\_V_O}$       |
| R7                    | $C_5H_2O_3CHO\_3H\_V_O^* \rightleftharpoons C_6H_4O_4\_2H\_V_O-I^*$   | $r_7 = k_7 \theta_{C_5H_2O_3CHO\_3H\_V_O} - k_{-7} \theta_{C_6H_4O_4\_2H\_V_O-I}$         |
| R7'                   | $C_5H_2O_3CHO\_3H\_V_O^* \rightleftharpoons C_6H_4O_4\_2H\_V_O-II^*$  | $r_{7'} = k_{7'} \theta_{C_5H_2O_3CHO\_3H\_V_O} - k_{-7'} \theta_{C_6H_4O_4\_2H\_V_O-II}$ |
| <b>Pathway B-bare</b> |                                                                       |                                                                                           |
| R8                    | $C_6H_6O_3-I^* \rightleftharpoons C_5H_3O_2CH_2O\_H^*$                | $r_8 = k_8 \theta_{C_6H_6O_3-I} - k_{-8} \theta_{C_5H_3O_2CH_2O\_H}$                      |
| R9                    | $C_5H_3O_2CH_2O\_H^* \rightleftharpoons C_6H_4O_3\_2H^*$              | $r_9 = k_9 \theta_{C_5H_3O_2CH_2O\_H} - k_{-9} \theta_{C_6H_4O_3\_2H}$                    |
| R10                   | $C_6H_4O_3\_2H^* \rightleftharpoons C_5H_3O_2COO\_3H\_V_O^*$          | $r_{10} = k_{10} \theta_{C_6H_4O_3\_2H} - k_{-10} \theta_{C_5H_3O_2COO\_3H\_V_O}$         |
| R11                   | $C_5H_3O_2COO\_3H\_V_O^* \rightleftharpoons C_6H_4O_4\_2H\_V_O-I^*$   | $r_{11} = k_{11} \theta_{C_5H_3O_2COO\_3H\_V_O} - k_{-11} \theta_{C_6H_4O_4\_2H\_V_O-I}$  |
| <b>Pathway C-bare</b> |                                                                       |                                                                                           |
| R12                   | $C_6H_4O_4\_2H\_V_O-I^* \rightleftharpoons C_6H_4O_4\_2H\_V_O-II^*$   | $r_{12} = k_{12} \theta_{C_6H_4O_4\_2H\_V_O-I} - k_{-12} \theta_{C_6H_4O_4\_2H\_V_O-II}$  |

|                      |                                                                                        |                                                                                                      |
|----------------------|----------------------------------------------------------------------------------------|------------------------------------------------------------------------------------------------------|
| R13                  | $C_6H_4O_4\_2H\_VO-II^* \rightleftharpoons C_5H_3O_3CHOH\_H\_VO^*$                     | $r_{13} = k_{13}\theta_{C_6H_4O_4\_2H\_VO-II} - k_{-13}\theta_{C_5H_3O_3CHOH\_H\_VO}$                |
| R14                  | $C_5H_3O_3CHOH\_H\_VO^* \rightleftharpoons C_6H_4O_5\_2H\_2VO^*$                       | $r_{14} = k_{14}\theta_{C_5H_3O_3CHOH\_H\_VO} - k_{-14}\theta_{C_6H_4O_5\_2H\_2VO}$                  |
| R15                  | $C_6H_4O_5\_2H\_2VO^* \rightleftharpoons C_6H_4O_5(g) + ^*2H\_2VO$                     | $r_{15} = k_{15}\theta_{C_6H_4O_5\_2H\_2VO} - k_{-15}P_{C_6H_4O_5}\theta_{2H\_2VO}$                  |
| <b>Pathway B-OH</b>  |                                                                                        |                                                                                                      |
| R16<br>(or R8)       | $C_6H_6O_3-I^* \rightleftharpoons C_5H_3O_2CH_2O\_H^*$                                 | $r_{16} = k_{16}\theta_{C_6H_6O_3-I} - k_{-16}\theta_{C_5H_3O_2CH_2O\_H}$                            |
| R17                  | $C_5H_3O_2CH_2O\_H^* + H_2O(g) \rightleftharpoons C_5H_3O_2CH_2O\_2H\_OH^*$            | $r_{17} = k_{17}\theta_{C_5H_3O_2CH_2O\_H}P_{H_2O} - k_{-17}\theta_{C_5H_3O_2CH_2O\_2H\_OH}$         |
| R17'                 | $C_5H_3O_2CH_2O\_2H\_OH^* \rightleftharpoons C_6H_4O_3\_2H\_H_2O^*$                    | $r_{17'} = k_{17'}\theta_{C_5H_3O_2CH_2O\_2H\_OH} - k_{-17'}\theta_{C_6H_4O_3\_2H\_H_2O}$            |
| R18                  | $C_6H_4O_3\_2H\_H_2O^* \rightleftharpoons C_6H_4O_3\_3H\_OH^*$                         | $r_{18} = k_{18}\theta_{C_6H_4O_3\_2H\_H_2O} - k_{-18}\theta_{C_6H_4O_3\_3H\_OH}$                    |
| R18'                 | $C_6H_4O_3\_3H\_OH^* \rightleftharpoons C_5H_3O_2CHOOH\_3H^*$                          | $r_{18'} = k_{18'}\theta_{C_6H_4O_3\_3H\_OH} - k_{-18'}\theta_{C_5H_3O_2CHOOH\_3H}$                  |
| R19                  | $C_5H_3O_2CHOOH\_3H^* + H_2O(g) \rightleftharpoons$<br>$C_5H_3O_2CHOOH\_4H\_OH^*$      | $r_{19} = k_{19}\theta_{C_5H_3O_2CHOOH\_3H}P_{H_2O} - k_{-19}\theta_{C_5H_3O_2CHOOH\_4H\_OH}$        |
| R19'                 | $C_5H_3O_2CHOOH\_4H\_OH^* \rightleftharpoons C_6H_4O_4\_4H\_H_2O^*$                    | $r_{19'} = k_{19'}\theta_{C_5H_3O_2CHOOH\_4H\_OH} - k_{-19'}\theta_{C_6H_4O_4\_4H\_H_2O}$            |
| R19''                | $C_6H_4O_4\_4H\_H_2O^* \rightleftharpoons C_6H_4O_4\_2H\_VO-I^* + 2H_2O(g)$            | $r_{19''} = k_{19''}\theta_{C_6H_4O_4\_4H\_H_2O} - k_{-19''}\theta_{C_6H_4O_4\_2H\_VO-II}P_{H_2O}^2$ |
| <b>Pathway CI-OH</b> |                                                                                        |                                                                                                      |
| R20<br>(or R13)      | $C_6H_4O_4\_2H\_VO-II^* \rightleftharpoons C_5H_3O_3CHOH\_H\_VO^*$                     | $r_{20} = k_{20}\theta_{C_6H_4O_4\_2H\_VO-II} - k_{-20}\theta_{C_5H_3O_3CHOH\_H\_VO}$                |
| R21                  | $C_5H_3O_3CHOH\_H\_VO^* + H_2O(g) \rightleftharpoons$<br>$C_5H_3O_3CHOH\_2H\_OH\_VO^*$ | $r_{21} = k_{21}\theta_{C_5H_3O_3CHOH\_H\_VO}P_{H_2O} - k_{-21}\theta_{C_5H_3O_3CHOH\_2H\_OH\_VO}$   |
| R21'                 | $C_5H_3O_3CHOH\_2H\_OH\_VO^* \rightleftharpoons$<br>$C_6H_4O_5\_2H\_H_2O\_2VO^*$       | $r_{21'} = k_{21'}\theta_{C_5H_3O_3CHOH\_2H\_OH\_VO} - k_{-21'}\theta_{C_6H_4O_5\_2H\_H_2O\_2VO}$    |

|                               |                                                                                                                                           |                                                                                                                                                            |
|-------------------------------|-------------------------------------------------------------------------------------------------------------------------------------------|------------------------------------------------------------------------------------------------------------------------------------------------------------|
| R22                           | $C_6H_4O_5\text{-}2H\text{-}H_2O\text{-}2V_O^* \rightleftharpoons C_6H_4O_5(g) +$<br>$*2H\text{-}H_2O\text{-}2V_O$                        | $r_{22} = k_{22}\theta_{C_6H_4O_5\text{-}2H\text{-}H_2O\text{-}2V_O} - k_{-22}P_{C_6H_4O_5}\theta_{2H\text{-}H_2O\text{-}2V_O}$                            |
| <b>Pathway CII-OH</b>         |                                                                                                                                           |                                                                                                                                                            |
| R23                           | $C_6H_4O_4\text{-}2H\text{-}V_O\text{-}II^* + H_2O(g) \rightleftharpoons$<br>$C_6H_4O_4\text{-}3H\text{-}OH\text{-}V_O^*$                 | $r_{23} = k_{23}\theta_{C_6H_4O_4\text{-}2H\text{-}V_O\text{-}II}P_{H_2O} - k_{-23}\theta_{C_6H_4O_4\text{-}3H\text{-}OH\text{-}V_O}$                      |
| R23'                          | $C_6H_4O_4\text{-}3H\text{-}OH\text{-}V_O^* \rightleftharpoons C_5H_3O_3\text{-}CHOOH\text{-}3H\text{-}V_O^*$                             | $r_{23'} = k_{23'}\theta_{C_6H_4O_4\text{-}3H\text{-}OH\text{-}V_O} - k_{-23'}\theta_{C_5H_3O_3\text{-}CHOOH\text{-}3H\text{-}V_O}$                        |
| R24                           | $C_5H_3O_3\text{-}CHOOH\text{-}3H\text{-}V_O^* + H_2O(g) \rightleftharpoons$<br>$C_5H_3O_3\text{-}CHOOH\text{-}4H\text{-}OH\text{-}V_O^*$ | $r_{24} = k_{24}\theta_{C_5H_3O_3\text{-}CHOOH\text{-}3H\text{-}V_O}P_{H_2O}$<br>$- k_{-24}\theta_{C_5H_3O_3\text{-}CHOOH\text{-}4H\text{-}OH\text{-}V_O}$ |
| R24'                          | $C_5H_3O_3\text{-}CHOOH\text{-}4H\text{-}OH\text{-}V_O^* \rightleftharpoons$<br>$C_6H_4O_5\text{-}4H\text{-}H_2O\text{-}V_O^*$            | $r_{24'} = k_{24'}\theta_{C_5H_3O_3\text{-}CHOOH\text{-}4H\text{-}OH\text{-}V_O} - k_{-24'}\theta_{C_6H_4O_5\text{-}4H\text{-}H_2O\text{-}V_O}$            |
| R25                           | $C_6H_4O_5\text{-}4H\text{-}H_2O\text{-}V_O^* \rightleftharpoons C_6H_4O_5(g) + *4H\text{-}H_2O\text{-}V_O$                               | $r_{25} = k_{25}\theta_{C_6H_4O_5\text{-}4H\text{-}H_2O\text{-}V_O} - k_{-25}P_{C_6H_4O_5}\theta_{4H\text{-}H_2O\text{-}V_O}$                              |
| <b>Catalyst replenishment</b> |                                                                                                                                           |                                                                                                                                                            |
| R15'                          | $*2H\text{-}2V_O + (3/2)O_2(g) \rightleftharpoons H_2O(g) + *$                                                                            | $r_{15'} = k_{15'}\theta_{2H\text{-}2V_O}P_{O_2}^{3/2} - k_{-15'}\theta_*P_{H_2O}$                                                                         |
| R22'                          | $*2H\text{-}H_2O\text{-}2V_O + (3/2)O_2(g) \rightleftharpoons 2H_2O(g) + *$                                                               | $r_{22'} = k_{22'}\theta_{2H\text{-}H_2O\text{-}2V_O}P_{O_2}^{3/2} - k_{-22'}\theta_*P_{H_2O}^2$                                                           |
| R25'                          | $*4H\text{-}H_2O\text{-}V_O + (3/2)O_2(g) \rightleftharpoons 3H_2O(g) + *$                                                                | $r_{25'} = k_{25'}\theta_{4H\text{-}H_2O\text{-}V_O}P_{O_2}^{3/2} - k_{-25'}\theta_*P_{H_2O}^3$                                                            |

**Note:** the rate constants for water adsorption, dissociation and catalyst replenishment are assumed to be fast and not interfere with the calculated overall rate of reaction.

**Table S3.** The constructed ODE equations for each elementary step of HMF oxidation to FDCA in four microkinetic models including MKM-I, MKM-II, MKM-III, and MKM-IV.

| MKM-I                                                              | MKM-II                                                                   |
|--------------------------------------------------------------------|--------------------------------------------------------------------------|
| $\frac{d\theta_{C_6H_6O_3-I^*}}{dt} = r_1 - r_2 - r_8$             | $\frac{d\theta_{C_6H_6O_3-I^*}}{dt} = r_1 - r_2 - r_{16}$                |
| $\frac{d\theta_{C_6H_6O_3-II^*}}{dt} = r_2 - r_3$                  | $\frac{d\theta_{C_6H_6O_3-II^*}}{dt} = r_2 - r_3$                        |
| $\frac{d\theta_{C_5H_5O_2COO-H_VO^*}}{dt} = r_3 - r_4$             | $\frac{d\theta_{C_5H_5O_2COO-H_VO^*}}{dt} = r_3 - r_4$                   |
| $\frac{d\theta_{C_6H_6O_4VO^*}}{dt} = r_4 - r_5$                   | $\frac{d\theta_{C_6H_6O_4VO^*}}{dt} = r_4 - r_5$                         |
| $\frac{d\theta_{C_5H_3O_3CH_2O-H_VO^*}}{dt} = r_5 - r_6$           | $\frac{d\theta_{C_5H_3O_3CH_2O-H_VO^*}}{dt} = r_5 - r_6$                 |
| $\frac{d\theta_{C_5H_3O_3CHO-3H_VO^*}}{dt} = r_6 - r_7$            | $\frac{d\theta_{C_5H_3O_3CHO-3H_VO^*}}{dt} = r_6 - r_7$                  |
| $\frac{d\theta_{C_6H_4O_4-2H_VO-I^*}}{dt} = r_7 + r_{11} - r_{12}$ | $\frac{d\theta_{C_5H_3O_2CH_2O-H^*}}{dt} = r_{16} - r_{17}$              |
| $\frac{d\theta_{C_5H_3O_2CH_2O-H^*}}{dt} = r_8 - r_9$              | $\frac{d\theta_{C_5H_3O_2CH_2O-2H-OH^*}}{dt} = r_{17} - r_{17'}$         |
| $\frac{d\theta_{C_6H_4O_3-2H^*}}{dt} = r_9 - r_{10}$               | $\frac{d\theta_{C_6H_4O_3-2H-H_2O^*}}{dt} = r_{17'} - r_{18}$            |
| $\frac{d\theta_{C_5H_3O_2COO-3H_VO^*}}{dt} = r_{10} - r_{11}$      | $\frac{d\theta_{C_6H_4O_3-3H-OH^*}}{dt} = r_{18} - r_{18'}$              |
| $\frac{d\theta_{C_6H_4O_4-2H_VO-II^*}}{dt} = r_{12} - r_{13}$      | $\frac{d\theta_{C_5H_3O_2CHOOH-3H^*}}{dt} = r_{18'} - r_{19}$            |
| $\frac{d\theta_{C_5H_3O_3CHOH-H_VO^*}}{dt} = r_{13} - r_{14}$      | $\frac{d\theta_{C_5H_3O_2CHOOO-4H-OH^*}}{dt} = r_{19} - r_{19'}$         |
| $\frac{d\theta_{C_6H_4O_5-2H-2VO^*}}{dt} = r_{14} - r_{15}$        | $\frac{d\theta_{C_6H_4O_4-4H-H_2O^*}}{dt} = r_{19'} - r_{19''}$          |
| $\frac{d\theta_{2H-2VO^*}}{dt} = r_{15} - r_{15'}$                 | $\frac{d\theta_{C_6H_4O_4-2H_VO-II^*}}{dt} = r_{7'} + r_{19''} - r_{13}$ |
|                                                                    | $\frac{d\theta_{C_5H_3O_3CHOH-H_VO^*}}{dt} = r_{13} - r_{14}$            |
|                                                                    | $\frac{d\theta_{C_6H_4O_5-2H-2VO^*}}{dt} = r_{14} - r_{15}$              |
|                                                                    | $\frac{d\theta_{2H-2VO^*}}{dt} = r_{15} - r_{15'}$                       |

| MKM-III                                                                   | MKM-IV                                                                    |
|---------------------------------------------------------------------------|---------------------------------------------------------------------------|
| $\frac{d\theta_{C_6H_6O_3-I^*}}{dt} = r_1 - r_2 - r_{16}$                 | $\frac{d\theta_{C_6H_6O_3-I^*}}{dt} = r_1 - r_2 - r_{16}$                 |
| $\frac{d\theta_{C_6H_6O_3-II^*}}{dt} = r_2 - r_3$                         | $\frac{d\theta_{C_6H_6O_3-II^*}}{dt} = r_2 - r_3$                         |
| $\frac{d\theta_{C_5H_5O_2COO_H_V O^*}}{dt} = r_3 - r_4$                   | $\frac{d\theta_{C_5H_5O_2COO_H_V O^*}}{dt} = r_3 - r_4$                   |
| $\frac{d\theta_{C_6H_6O_4-V O^*}}{dt} = r_4 - r_5$                        | $\frac{d\theta_{C_6H_6O_4-V O^*}}{dt} = r_4 - r_5$                        |
| $\frac{d\theta_{C_5H_3O_3CH_2O_H_V O^*}}{dt} = r_5 - r_6$                 | $\frac{d\theta_{C_5H_3O_3CH_2O_H_V O^*}}{dt} = r_5 - r_6$                 |
| $\frac{d\theta_{C_5H_3O_3CHO_3H_V O^*}}{dt} = r_6 - r_7$                  | $\frac{d\theta_{C_5H_3O_3CHO_3H_V O^*}}{dt} = r_6 - r_7$                  |
| $\frac{d\theta_{C_5H_3O_2CH_2O_H^*}}{dt} = r_{16} - r_{17}$               | $\frac{d\theta_{C_5H_3O_2CH_2O_H^*}}{dt} = r_{16} - r_{17}$               |
| $\frac{d\theta_{C_5H_3O_2CH_2O_2H_OH^*}}{dt} = r_{17} - r_{17'}$          | $\frac{d\theta_{C_5H_3O_2CH_2O_2H_OH^*}}{dt} = r_{17} - r_{17'}$          |
| $\frac{d\theta_{C_6H_4O_3_2H_H_2O^*}}{dt} = r_{17'} - r_{18}$             | $\frac{d\theta_{C_6H_4O_3_2H_H_2O^*}}{dt} = r_{17'} - r_{18}$             |
| $\frac{d\theta_{C_6H_4O_3_3H_OH^*}}{dt} = r_{18} - r_{18'}$               | $\frac{d\theta_{C_6H_4O_3_3H_OH^*}}{dt} = r_{18} - r_{18'}$               |
| $\frac{d\theta_{C_5H_3O_2CHOOH_3H^*}}{dt} = r_{18'} - r_{19}$             | $\frac{d\theta_{C_5H_3O_2CHOOH_3H^*}}{dt} = r_{18'} - r_{19}$             |
| $\frac{d\theta_{C_5H_3O_2CHOOO_4H_OH^*}}{dt} = r_{19} - r_{19'}$          | $\frac{d\theta_{C_5H_3O_2CHOOO_4H_OH^*}}{dt} = r_{19} - r_{19'}$          |
| $\frac{d\theta_{C_6H_4O_4_4H_H_2O^*}}{dt} = r_{19'} - r_{19''}$           | $\frac{d\theta_{C_6H_4O_4_4H_H_2O^*}}{dt} = r_{19'} - r_{19''}$           |
| $\frac{d\theta_{C_6H_4O_4_2H_V O-II^*}}{dt} = r_{7'} + r_{19''} - r_{20}$ | $\frac{d\theta_{C_6H_4O_4_2H_V O-II^*}}{dt} = r_{7'} + r_{19''} - r_{23}$ |
| $\frac{d\theta_{C_5H_3O_3CHOH_H_V O^*}}{dt} = r_{20} - r_{21}$            | $\frac{d\theta_{C_6H_4O_4_3H_OH_V O^*}}{dt} = r_{23} - r_{23'}$           |
| $\frac{d\theta_{C_5H_3O_3CHOH_2H_OH_V O^*}}{dt} = r_{21} - r_{21'}$       | $\frac{d\theta_{C_5H_3O_3CHOOH_3H_V O^*}}{dt} = r_{23'} - r_{24}$         |
| $\frac{d\theta_{C_6H_4O_5_2H_H_2O_2V O^*}}{dt} = r_{21'} - r_{22}$        | $\frac{d\theta_{C_5H_3O_3CHOOH_4H_OH_V O^*}}{dt} = r_{24} - r_{24'}$      |
| $\frac{d\theta_{2H_H_2O_2V O^*}}{dt} = r_{22} - r_{22'}$                  | $\frac{d\theta_{C_6H_4O_4_3H_OH_V O^*}}{dt} = r_{24'} - r_{25}$           |
|                                                                           | $\frac{d\theta_{4H_H_2O_V O^*}}{dt} = r_{25} - r_{25'}$                   |



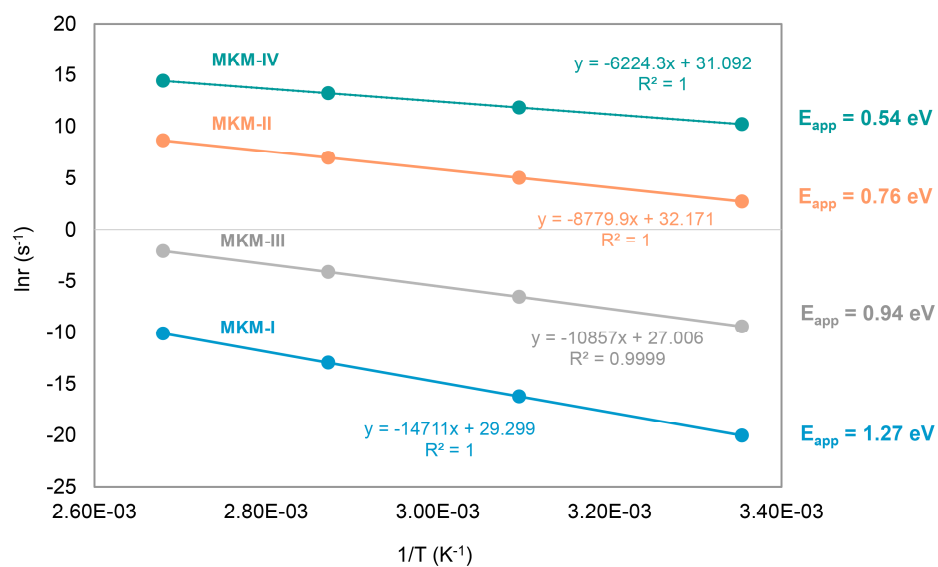

**Figure S8.** The natural logarithm of reaction rate (in  $\text{s}^{-1}$ ) of HMF oxidation as a function of  $1/T$  (in  $\text{K}^{-1}$ ) and the calculated apparent activation energy ( $E_{\text{app}}$ ) of each microkinetic model.

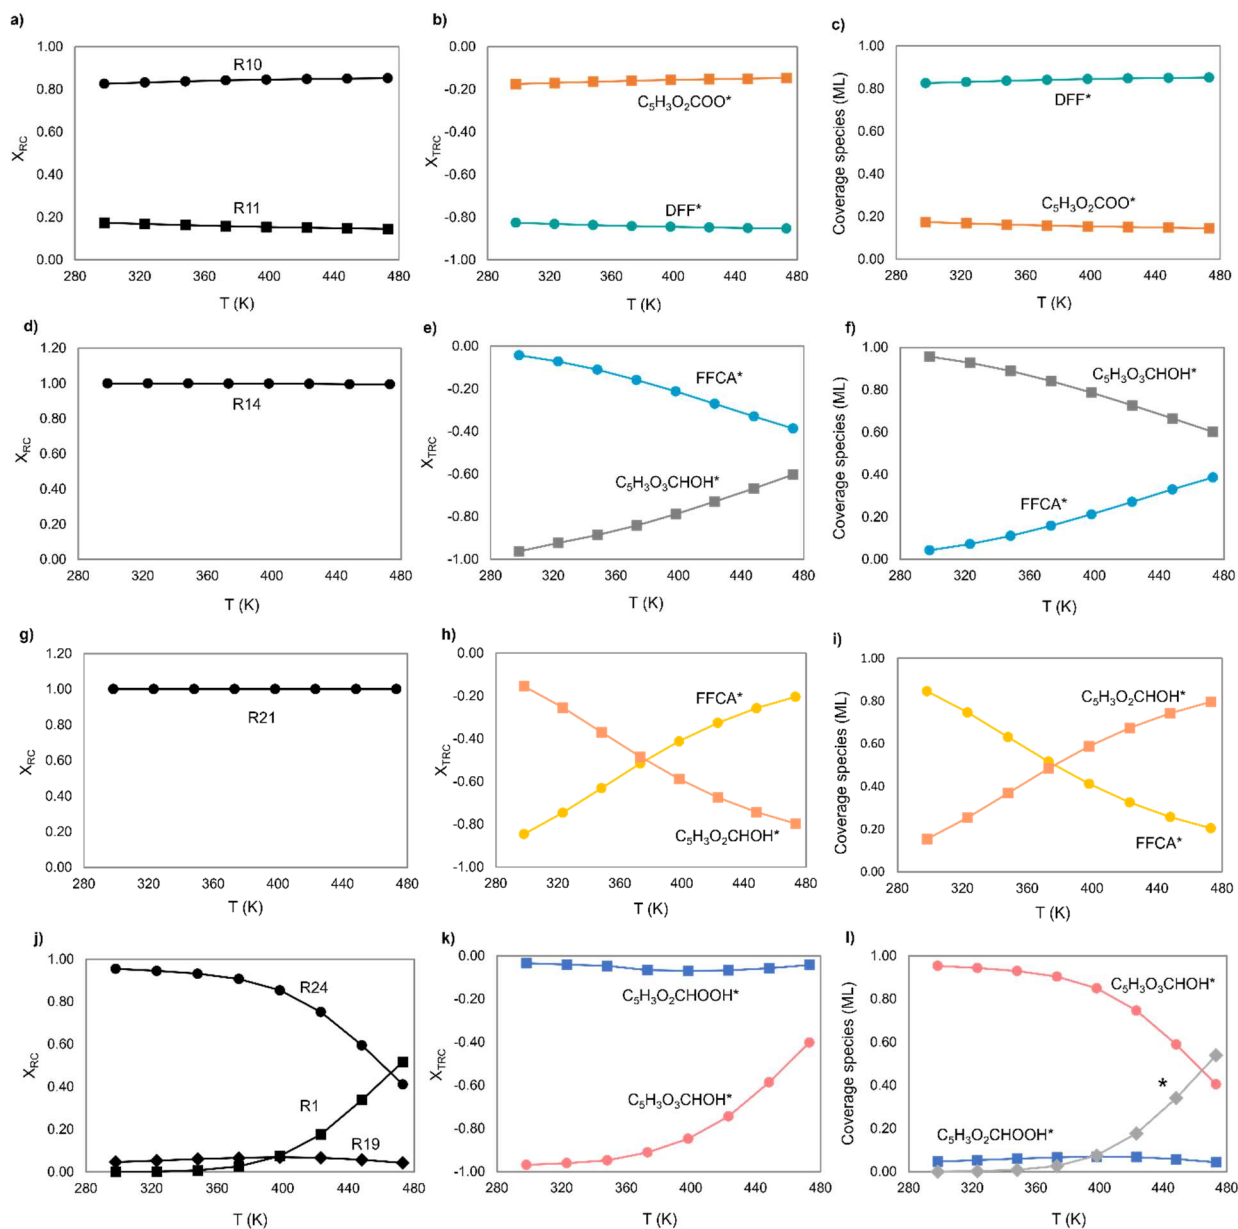

**Figure S9.** The primary Campbell's degree of rate control ( $X_{RC, i}$ ), the degree of thermodynamic rate control ( $X_{TRC, i}$ ), and the primary intermediate coverage versus temperature (in K) of HMF oxidation in MKM-I (a, b, and c), MKM-II (d, e, and f), MKM-III (g, h, and i), and MKM-IV (j, k, and l), respectively.

## S1.7 Electronic charge analysis

Bader charges<sup>3</sup> of selected configurations were calculated to understand the local charge properties around the active sites as shown in Figure S10. The negative and positive values represent the partial negative charge via electron increment and the partial positive charge via electron depletion, respectively.

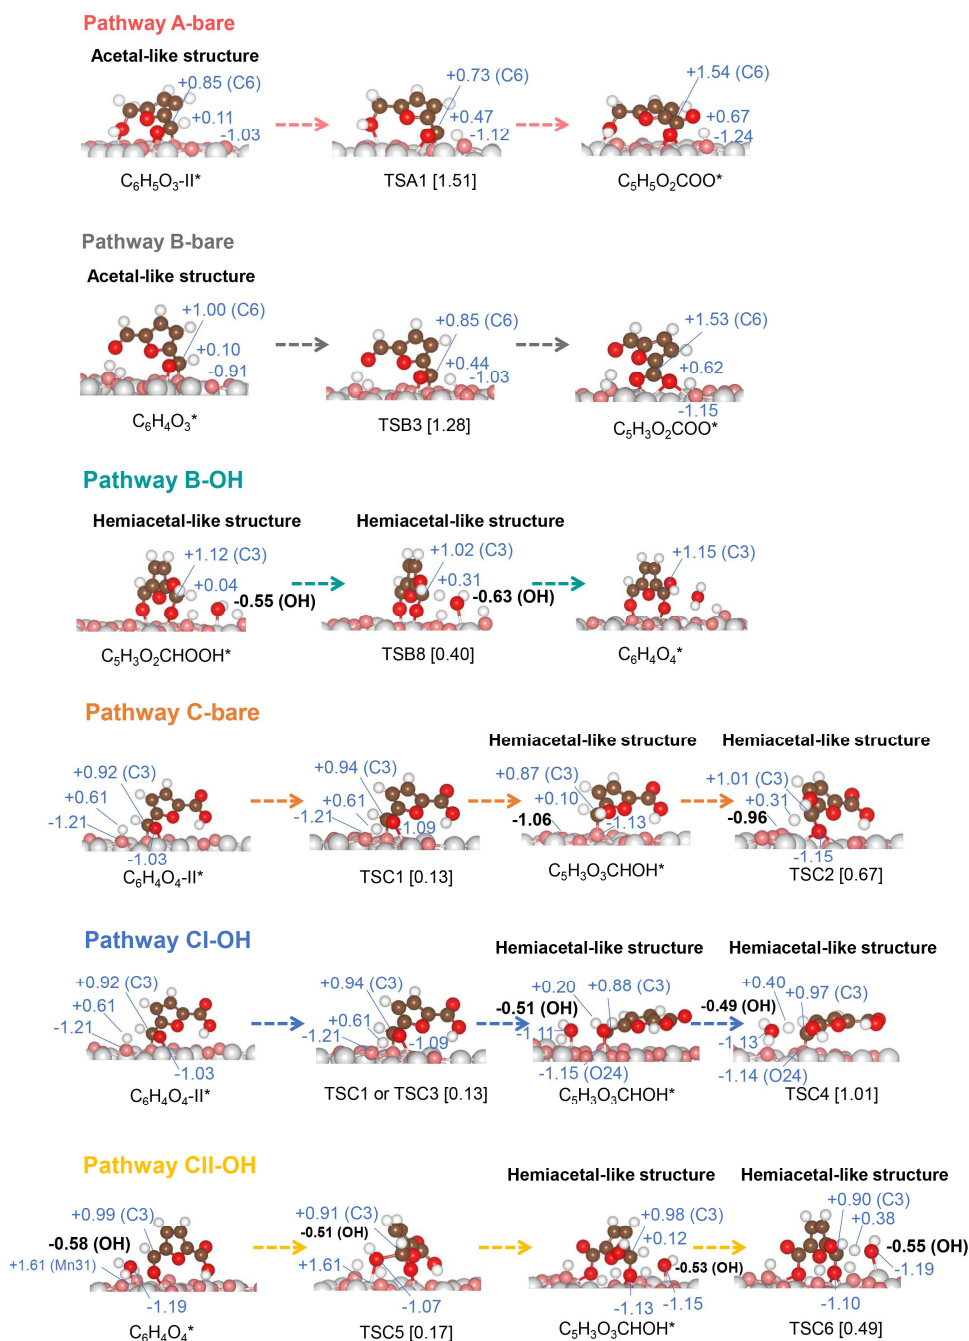

**Figure S10.** Bader charge analyses of selected steps of HMF oxidation on bare and hydroxylated surfaces. The activation barriers (in eV) are given in square brackets.

## S2 Experiment

### S2.1 Continuous flow oxidation of HMF over the synthesized $\beta$ -MnO<sub>2</sub> catalyst

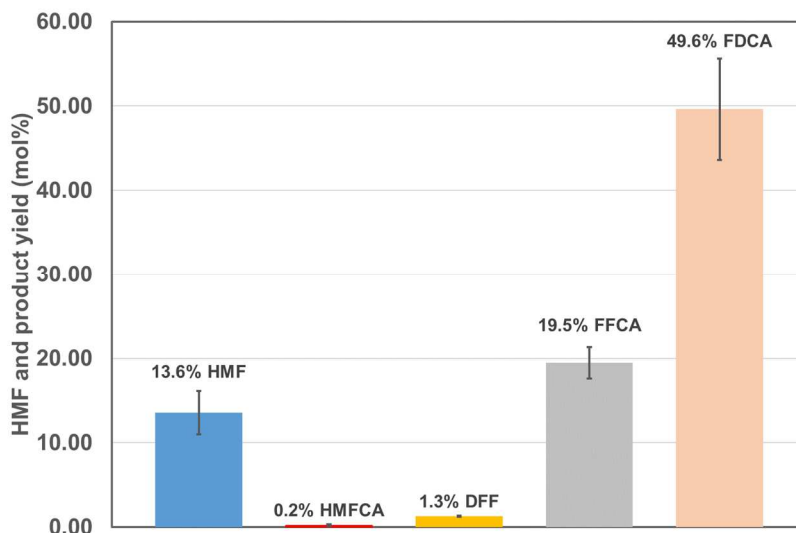

**Figure S11.** Continuous flow oxidation of HMF over  $\beta$ -MnO<sub>2</sub> catalyst: Reaction conditions:  $\beta$ -MnO<sub>2</sub> (1 mL), HMF in DI water (40 mM), NaHCO<sub>3</sub> (3 equiv with respect to HMF),  $p$ O<sub>2</sub> (1 MPa), 393 K and LHSV of 4 h<sup>-1</sup>. Average value over 6-10 h time-on-stream (steady state).

### S2.2 Oxidation of HMF using a batch reactor over the synthesized $\beta$ -MnO<sub>2</sub> catalyst

**Experimental procedure.** The procedure for catalytic efficiency testing of the obtained  $\beta$ -MnO<sub>2</sub> was adapted from Hayashi et al.<sup>4</sup> The HMF oxidation was carried out in a 100 mL stainless steel autoclave reactor with a 30 mL Teflon liner containing a magnetic stirring bar. Typically, HMF (1.2 mmol),  $\beta$ -MnO<sub>2</sub> powder (300 mg), NaHCO<sub>3</sub> (3.6 mmol), water (30 mL), and O<sub>2</sub> (2 MPa) were charged into the autoclave reactor. The reaction solution was heated to 393 K. The solution sampling was started at which the temperature reached set point and collected continually to monitor the progress of reaction. The sampled solution was filtered using 0.22  $\mu$ m pore size membrane filter and the filtrate was diluted 10 times with water. The formation of FDCA and their intermediates and the decreasing of HMF were investigated using the high performance liquid chromatography (HPLC, Shimadzu), with a UV detector adjusted to 260 nm for analysis of FDCA and HMFCa and to 280 nm for analysis of HMF, FFCA and DFF, using an Aminex HPX-87H ion-exchange column (300 mm in length with a 7.8 mm i.d.; Bio-Rad, Hercules, CA, USA). The column temperature was set at 318 °C. The samples were eluted with 5 mM sulfuric acid solution in DI water at a flow rate of 0.6 mL/min.

Figure S12 shows the progress of reaction regarding the changes of HMF, HMFCFA, DFF, FFCA and FDCA over time. It is seen that DFF and HMFCFA intermediates were occurred since 0 hour (i.e., when the temperature reached set point), indicating that reaction pathway from HMF to FFCA occurred through both DFF and HMFCFA in the current system. The yields of those intermediates reach their maxima at 4 h for DFF (~3.7%) and 8 h for HMFCFA (~3.4%), showing higher rate of DFF production at the beginning. Additionally, DFF which was subsequently oxidized into FFCA are completely consumed before HMFCFA, indicating that the pathway with DFF as the intermediate is more dominant than the HMFCFA route in the current system. The produced FFCA is gradually increased against reaction time with an increasing of FDCA. After 24 h, the decreasing of FFCA is observed with continuous increasing of FDCA until 45 h at which the FFCA is almost used up whereas the FDCA yield reaches its maximum at ~60%, suggesting that the oxidation of FFCA to FDCA is the rate-determining step.

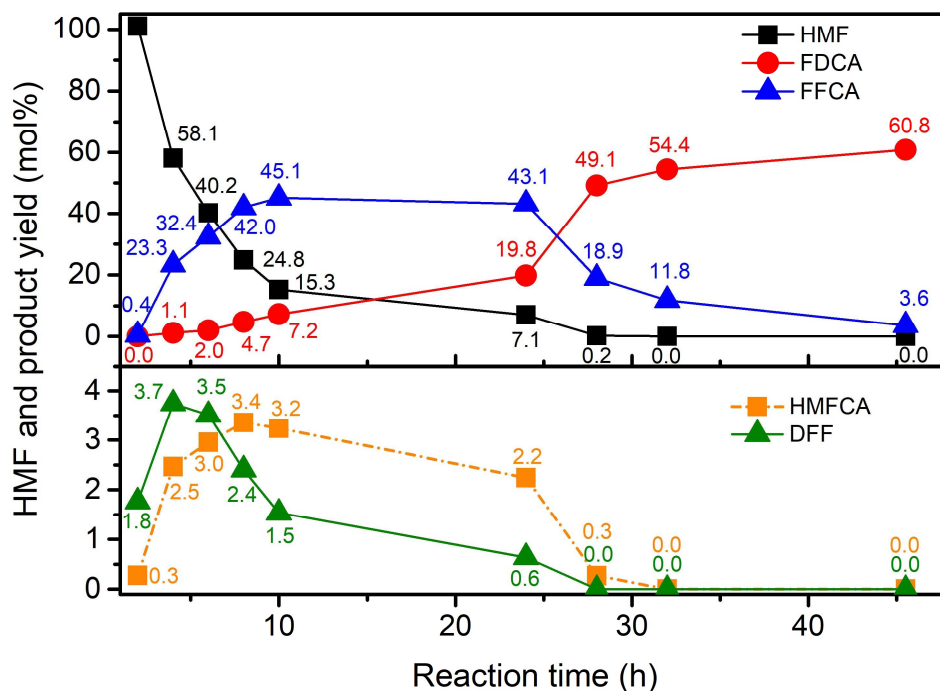

**Figure S12.** Time course for the oxidation of HMF into FDCA catalyzed by  $\beta$ -MnO<sub>2</sub> in a batch reactor. Reaction conditions: HMF (1.2 mmol),  $\beta$ -MnO<sub>2</sub> powder (300 mg), NaHCO<sub>3</sub> (3.6 mmol), water (30 mL), and  $p$ O<sub>2</sub> (2 MPa), 393 K.

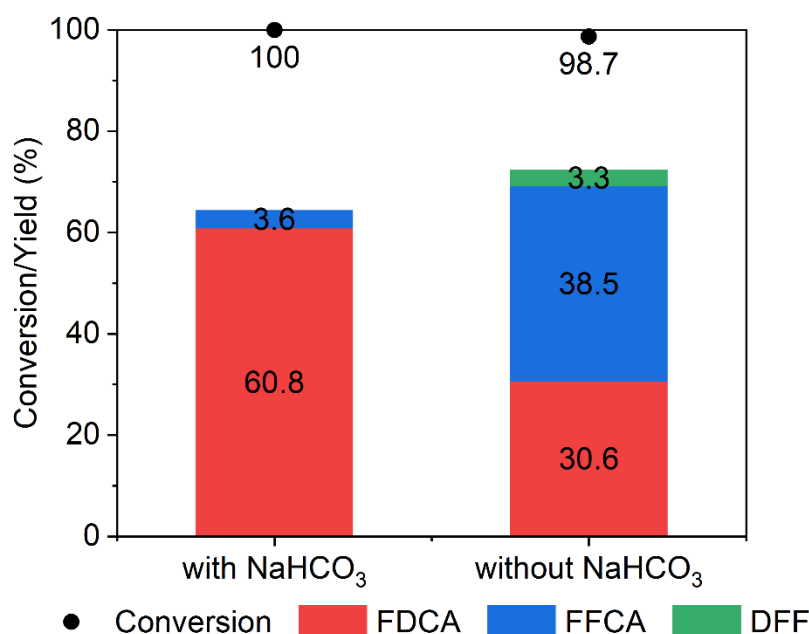

**Figure S13.** Effects of NaHCO<sub>3</sub> on the oxidation of HMF into FDCA catalyzed by  $\beta$ -MnO<sub>2</sub> in a batch reactor. Reaction conditions: HMF (1.2 mmol),  $\beta$ -MnO<sub>2</sub> powder (300 mg), water (30 mL), and  $pO_2$  (2 MPa), 393 K. For the reaction with NaHCO<sub>3</sub>, NaHCO<sub>3</sub> (3.6 mmol) was added to the above reaction mixture prior to heating.

### S2.3 Characterizations of the $\beta$ -MnO<sub>2</sub> catalyst

Temperature-programmed desorption of CO<sub>2</sub> (CO<sub>2</sub> TPD) was carried out using a Dynamic Flow Chemisorption Analyzer equipped with a thermal conductivity detector, Quantachrome Instruments. The catalyst (0.2 g) was pretreated in a He flow (30 mL/min) at 150 °C for 1 h with a ramp rate of 5 °C/min. The catalyst was cooled to 60 °C under He flow (30 mL/min) and CO<sub>2</sub> was then allowed to adsorb. Finally, the CO<sub>2</sub> TPD experiment was carried out in He flow in a temperature range of 45–800 °C at a ramp rate of 5 °C/min.

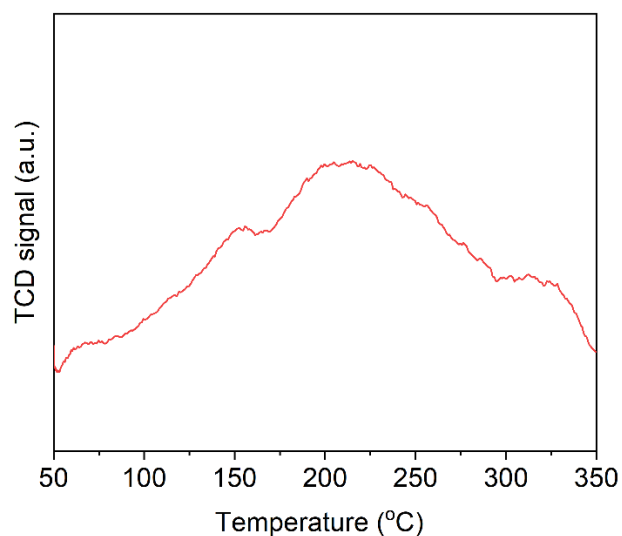

**Figure S14.** CO<sub>2</sub> TPD of fresh  $\beta$ -MnO<sub>2</sub> catalysts.

In situ DRIFTS was performed using a Nicolet iS50 infrared spectrometer (Thermo Scientific, Waltham, MA, USA) equipped with a mercury-cadmium-telluride (MCT) detector, a diffuse reflection attachment Praying Mantis™ and a high-temperature reaction cell. The catalyst sample was heated to 50 °C under Ar and the spectrum was recorded.

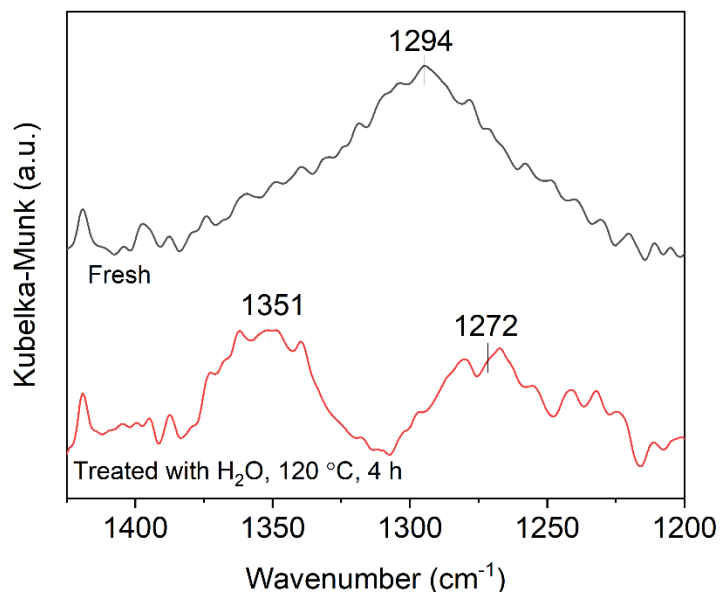

**Figure S15.** In situ DRIFTS collected at 50 °C under Ar of as synthesized  $\beta$ -MnO<sub>2</sub> catalyst and after treatment with H<sub>2</sub>O at 120 °C for 4 h.

## S2.4 Characterization of FDCA

A portion of the reaction solution obtained from the flow reactor was acidified using conc. HCl while stirring to precipitate FDCA as shown in Figure S16. Identification of FDCA was further confirmed by  $^1\text{H}$  and  $^{13}\text{C}$  NMR analysis as shown in Figure S17 and S18, respectively.  $^1\text{H}$  and  $^{13}\text{C}$  NMR analyses show that the product is indeed FDCA as the peaks are well correspond to the structure of FDCA.<sup>5</sup>

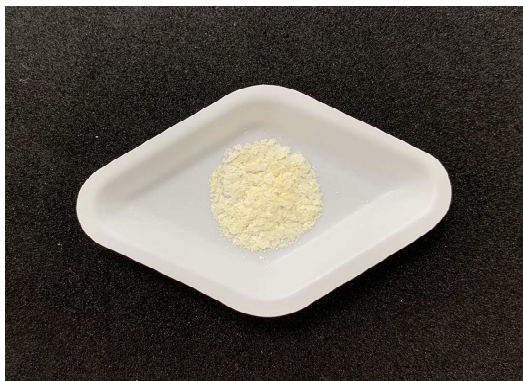

**Figure S16.** FDCA obtained from the acidification of reaction solution using conc. HCl until pH of around 1 was obtained. The product was filtered by vacuum filtration and dried overnight to obtain pale white yellow powder.

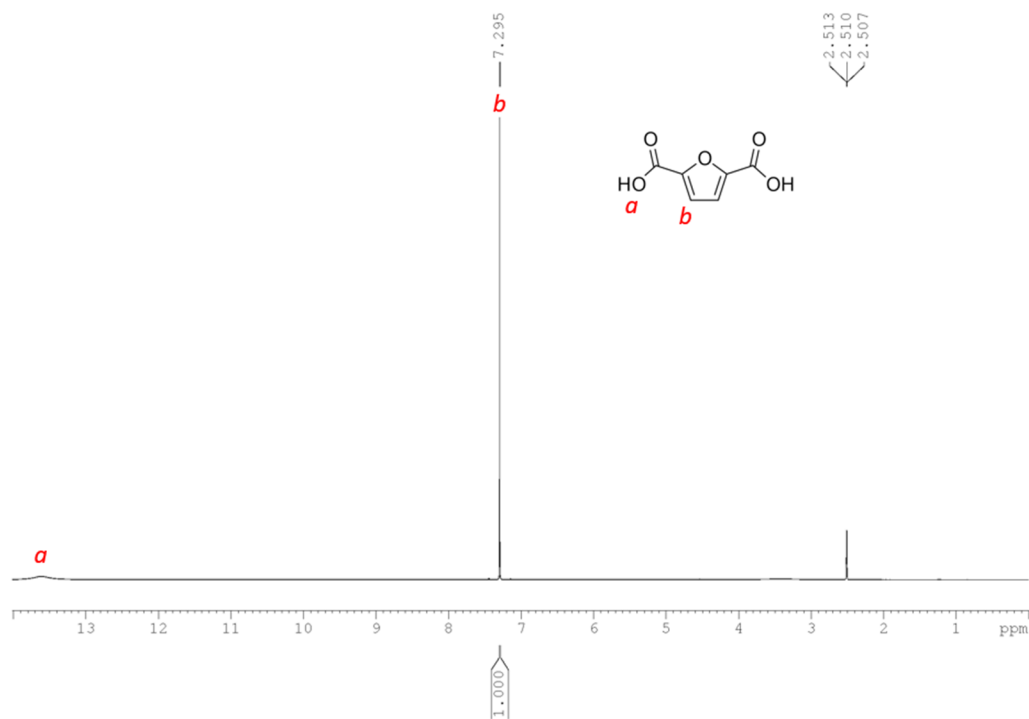

**Figure S17.**  $^1\text{H}$  NMR of FDCA.



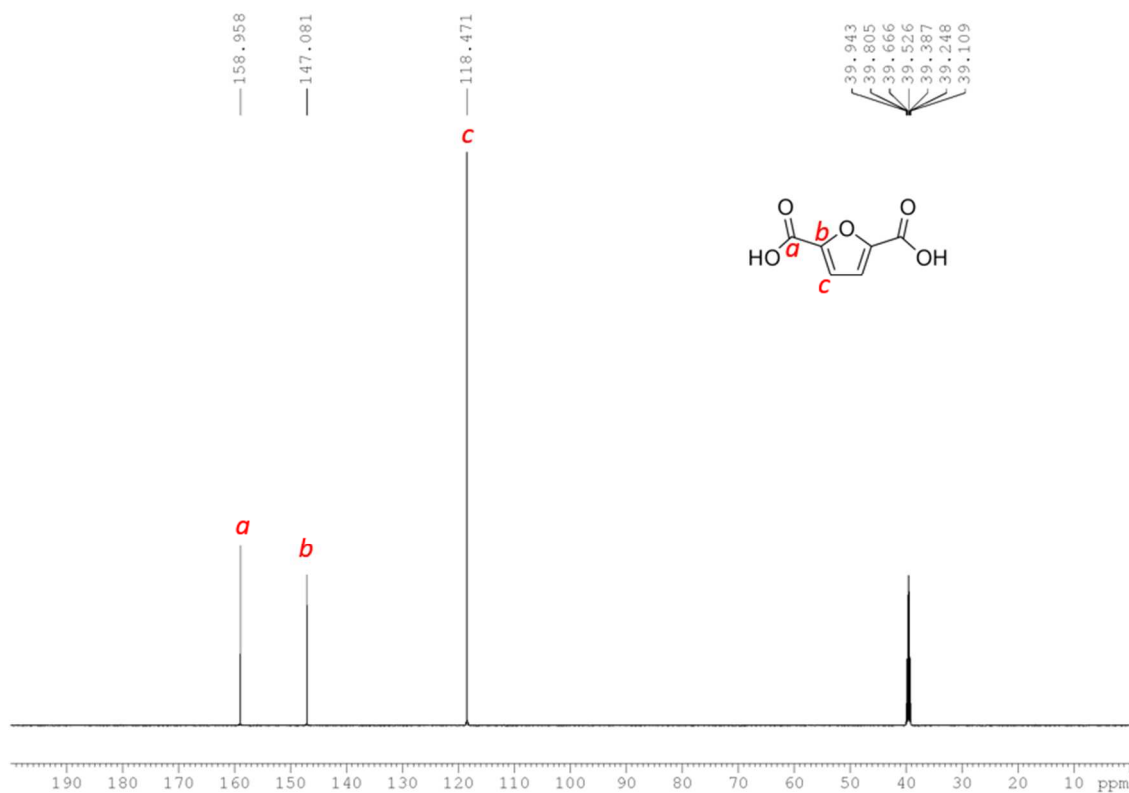

**Figure S18.**  $^{13}\text{C}$  NMR of FDCA.

## References

1. J. Ren, K.-h. Song, Z. Li, Q. Wang, J. Li, Y. Wang, D. Li and C. K. Kim, *Appl. Surf. Sci.*, 2018, **456**, 174-183.
2. X. Liao, J. Hou, Y. Wang, H. Zhang, Y. Sun, X. Li, S. Tang, K. Kato, M. Yamauchi and Z. Jiang, *Green Chem.*, 2019, **21**, 4194-4203.
3. G. Henkelman, A. Arnaldsson and H. Jónsson, *Comput. Mater. Sci.*, 2006, **36**, 354-360.
4. E. Hayashi, Y. Yamaguchi, K. Kamata, N. Tsunoda, Y. Kumagai, F. Oba and M. Hara, *J. Am. Chem. Soc.*, 2019, **141**, 890-900.
5. K. Gupta, R. K. Rai and S. K. Singh, *Inorg. Chem. Front.*, 2017, **4**, 871-880.
